# Supplementary material
Source: publisher figshare collection journal article supplement (https://acs.figshare.com/ndownloader/files/16191305)
Supplement: Supplementary file 1 [file 16191305]

Permission Request Form for Use of *Individual and/or Group Photos*  
in *ACS LiveSlides* from Copyright Owners/Publishers/Photographers  
Other Than ACS

Date: 7/8/19

To: Janice Edgerly Rooks  
Publisher's/Copyright Owner's Contact Information

From: Grace Stokes  
Your Name and Complete Mailing Address

jedgerly.rooks@sca.edu  
Publisher's/Copyright Owner's Email Address

408-584-5389  
Your Phone Number Including Country and City Codes  
gstokes@sca.edu  
Your Email Address

Your Specific Deadline Date

I am preparing an *ACS LiveSlides* entitled:

Length and charge of Water-Soluble Peptides Impact Binding  
to appear with to Phospholipid Membranes  
DOI: 10.1021/acs.jpcb.9b0461  
Title of ACS Publication and DOI

which is published by the American Chemical Society, a not-for-profit membership society and a STM signatory.

I would appreciate your permission to use the following material in all formats including but not limited to print, microform, electronic, and/or CD-ROM from the following reference:

Individual Photographs of the Following Individuals:

Collective Photograph (s) representing the following groups:

Stokes research lab.

If you, the photographer, have a required **credit line**, please include it below:

For your convenience, you may sign and date the bottom of this letter to indicate your agreement. Please return this form to me at the above email address, by the above **deadline date** (if given above). Thank you.

Agreed:

J. Edgerly Rooks  
Publisher's/Copyright Owner's Signature or Stamp

Date:

7/8/19

Date

Submit completed and signed form with your signed *ACS LiveSlides* Video Release.

7/25/16
